# Supplementary material
Source: publisher figshare collection journal article supplement (https://tandf.figshare.com/ndownloader/files/12297005)
Supplement: Supplementary file 1 [file 12297005]

**Table. S1 Pompano sample specification and quantity**

|  | Specification/g | Quantity per day | Days of  measurement | Total weight/g |
| --- | --- | --- | --- | --- |
| Texture | 10 | 10 | 6 | 600 |
| TVB-N | 10 | 10 | 6 | 600 |
| pH | 10 | 10 | 6 | 600 |
| TVC | 10 | 10 | 6 | 600 |
| EN | 10 | 10 | 6 | 600 |
| Forecasting | 10 | 10 | 6 | 600 |

Fig. S1


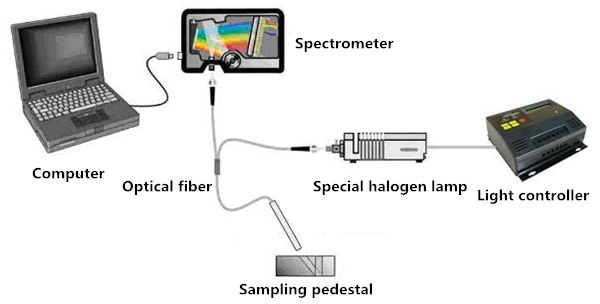


**Section S1**

SR system consists of three factors, a bistable system, an input signal and an extra noise source. An over-damped Brownian motion particle driven by cycle power in a bistable potential well is usually used to describe the characteristics of SR system.

(1)

Where is a nonlinear symmetric potential function, is the Gaussian white noise, its autocorrelation function is , *A* is periodical signal intensity, is modulating signal frequency, is noise intensity, and and are real parameters.

(2)

So, Eq. (1) can be transformed into Eq. (3):

(3)

SNR is usually utilized for SR characterization:

(4)

where is the density of signal spectra, and is noise intensity within the range of signal frequency.

Under adiabatic elimination condition, supposing signal amplitude is much smaller (A<<1), the Brownian particle is in one of potential wells because no enough driving energy is provided by the bistable system to drive the particle to jump from one potential well to another one in the absence of external noise. The signal period is longer than some characteristic intra-well relaxation time for the system. The existence of periodic forcing inclines the potential function, and forms the Brownian particle’s transfer from one potential well to another one. So the potential function changes with the input signal and becomes

(5)

Eq. 4 indicates the potential function gets time dependence. Eq. 5 displays the first-order and second-order derivation of with respect to, and let the equations equal to zero:

(6)

Setting noise intensityand, the critical amplitude value of the periodic signal can be obtained:. If, the particle hovers around its original stable state and can not jump from one potential well to another one. However, the particle can jump from one potential well to another one with the help of external noise even if, which means the occurrence of SR phenomenon. We use fourth-order Runge-Kutta numerical algorithm to solve Eq. 1:

, (7)

(8)

(9)

(10)

(11)

is the *n*th numerical value of , andis the *n*th numerical value of. is the computation step. Much progress has been achieved on the applications of SR in the past few decades.

Single SR system connected in series forms the cascaded SR to obtain DCSSR. According to Eq. 1, the relative Langevin equations of the cascaded bistable systems can be respectively written as:

(12)

In practical measurement, measured data usually consists of signal and intrinsic noise. If an aimed weak signal is submerged in strong noise, we are not able to detect it. With the help of SR, the energy of intrinsic noise is lowered, and the embedded weak signal is amplified effectively so that the signal can be caught for measurement characterization. In some special measurement, the weak signal is so weak that the aimed signals are still embedded in the noise. Double-layered SR is designed to solve this problem. For a double-layered SR system, several bistable systems are in serial. If the measurement signals are still embedded in the noise, the output of the former bistable system is taken as the latter bistable system. If the aimed signals are successfully obtained, the current number of bistable systems is the suitable for the information measurement.
